# Supplementary material for: Genetic diversity of the highly variable V1 region interferes with Human Immunodeficiency Virus type 1 envelope functionality
Source: PubMed Central journal article supplement (PMC3826872; doi:10.1186/1742-4690-10-114), 2013-10-24
Supplement: 1742-4690-10-114-S1.pdf [file 1742-4690-10-114-S1.pdf]

Table S1

|      |     | wt of reference | Viral entry % | SD (%)   |
|------|-----|-----------------|---------------|----------|
| V1V2 | ABA | A               | 141.5         | 52.1     |
|      |     | B               | 544.4         | 252.5    |
|      | ACA | A               | 29.1          | 9.2      |
|      |     | C               | 170.6         | 44.7     |
|      | AGA | A               | 72.5          | 23.0     |
|      |     | G               | 4195.2        | 3673.2   |
|      | BCB | B               | 1.1           | 1.0      |
|      |     | C               | 2.4           | 2.6      |
| BGB  | B   | 3.2             | 3.5           |          |
|      | G   | 65.7            | 60.9          |          |
| V1   | ABA | A               | 44.3          | 13.4     |
|      |     | B               | 151.1         | 81.1     |
|      | ACA | A               | 15.7          | 10.1     |
|      |     | C               | 134.0         | 75.4     |
|      | AGA | A               | 9.0           | 1.8      |
|      |     | G               | 830.4         | 788.8    |
|      | BCB | B               | 9.6           | 4.1      |
|      |     | C               | 14.1          | 7.8      |
| BGB  | B   | 0.7             | 0.3           |          |
|      | G   | 17.1            | 9.5           |          |
| V2   | ABA | A               | 66.0          | 25.9     |
|      |     | B               | 260.3         | 145.1    |
|      | ACA | A               | 53.1          | 8.7      |
|      |     | C               | 359.5         | 185.9    |
|      | AGA | A               | 125.5         | 38.7     |
|      |     | G               | 11441.9       | 6324.6   |
|      | BCB | B               | 1.7           | 1.1      |
|      |     | C               | 1.9           | 1.1      |
| BGB  | B   | 0.7             | 0.5           |          |
|      | G   | 20.3            | 18.8          |          |
| V3   | ACA | A               | 53.7          | 9.0      |
|      |     | C               | 272.3         | 92.2     |
|      | AGA | A               | 47.2          | 12.9     |
|      |     | G               | 1.37E+08      | 1.15E+08 |
|      | BCB | B               | 124.0         | 46.8     |
|      |     | C               | 211.0         | 66.8     |
| BGB  | B   | 139.0           | 24.5          |          |
|      | G   | 2907.6          | 1167.0        |          |
