# Supplementary material for: Genetic diversity of the highly variable V1 region interferes with Human Immunodeficiency Virus type 1 envelope functionality
Source: PubMed Central journal article supplement (PMC3826872; doi:10.1186/1742-4690-10-114), 2013-10-24
Supplement: 1742-4690-10-114-S2.pdf [file 1742-4690-10-114-S2.pdf]

| chimeras | V1   | V2   | $\beta$ -A | V1 loop | $\beta$ -B | connect | $\beta$ -C | V2 loop | $\beta$ -D |
|----------|------|------|------------|---------|------------|---------|------------|---------|------------|
| A/B      | 62.5 | 69.6 | 100.0      | 50.0    | 100.0      | 66.7    | 81.8       | 57.7    | 100.0      |
| A/C      | 56.3 | 78.3 | 100.0      | 40.9    | 77.8       | 100.0   | 90.9       | 66.7    | 80.0       |
| A/G      | 52.9 | 76.1 | 100.0      | 33.3    | 100.0      | 100.0   | 90.9       | 52.4    | 100.0      |
| B/C      | 42.5 | 70.5 | 100.0      | 26.7    | 77.8       | 66.7    | 90.9       | 50.0    | 80.0       |
| B/G      | 52.5 | 77.5 | 100.0      | 36.7    | 100.0      | 66.7    | 90.9       | 53.3    | 60.0       |

Table S2
